# Supplementary material for: Negative Affect Induces Rapid Learning of Counterfactual Representations: A Model-based Facial Expression Analysis Approach
Source: bioRxiv or medRxiv preprint supplement (doi:10.1101/560011), 2021-04-11

Table S1  
*All description-based games used in the current study*

| Set | Game | Option A |                    |       |                    | Option B |                    |       |                    | Pr(Choose A) |     |
|-----|------|----------|--------------------|-------|--------------------|----------|--------------------|-------|--------------------|--------------|-----|
|     |      | $A_H$    | (Pr <sub>H</sub> ) | $A_L$ | (Pr <sub>L</sub> ) | $B_H$    | (Pr <sub>H</sub> ) | $B_L$ | (Pr <sub>L</sub> ) | No FB        | FB  |
| 1   | 1    | 3        | (1)                | –     | –                  | 4        | (.8)               | 0     | (.2)               | .41          | .16 |
| 1   | 2    | 3        | (.25)              | 0     | (.75)              | 4        | (.2)               | 0     | (.8)               | .25          | .13 |
| 1   | 3    | -1       | (1)                | –     | –                  | 0        | (.5)               | -2    | (.5)               | .28          | .1  |
| 1   | 4    | 1        | (1)                | –     | –                  | 2        | (.5)               | 0     | (.5)               | .5           | .18 |
| 1   | 5    | -3       | (1)                | –     | –                  | 0        | (.2)               | -4    | (.8)               | .31          | .18 |
| 1   | 6    | 0        | (.75)              | -3    | (.25)              | 0        | (.8)               | -4    | (.2)               | .46          | .31 |
| 1   | 7    | -1       | (1)                | –     | –                  | 0        | (.95)              | -20   | (.05)              | .38          | .12 |
| 1   | 8    | 1        | (1)                | –     | –                  | 20       | (.05)              | 0     | (.95)              | .47          | .34 |
| 1   | 9    | 1        | (1)                | –     | –                  | 100      | (.01)              | 0     | (.99)              | .38          | .34 |
| 1   | 10   | 2        | (1)                | –     | –                  | 101      | (.01)              | 1     | (.99)              | .32          | .33 |
| 1   | 11   | 19       | (1)                | –     | –                  | 20       | (.9)               | -20   | (.1)               | .78          | .53 |
| 1   | 12   | 0        | (1)                | –     | –                  | 50       | (.5)               | -50   | (.5)               | .55          | .22 |
| 1   | 13   | 0        | (1)                | –     | –                  | 50       | (.5)               | -50   | (.5)               | .5           | .22 |
| 1   | 14   | 0        | (1)                | –     | –                  | 1        | (.5)               | -1    | (.5)               | .38          | .29 |
| 1   | 15   | 7        | (1)                | –     | –                  | 50       | (.5)               | 1     | (.5)               | .09          | .01 |
| 1   | 16   | 7        | (1)                | –     | –                  | 50       | (.5)               | -1    | (.5)               | .16          | .02 |
| 1   | 17   | 30       | (1)                | –     | –                  | 50       | (.5)               | 1     | (.5)               | .63          | .32 |
| 1   | 18   | 30       | (1)                | –     | –                  | 50       | (.5)               | -1    | (.5)               | .65          | .3  |
| 1   | 24   | -2       | (1)                | –     | –                  | -1       | (.5)               | -3    | (.5)               | .38          | .19 |
| 1   | 25   | 2        | (1)                | –     | –                  | 3        | (.5)               | 1     | (.5)               | .49          | .26 |
| 1   | 26   | 16       | (1)                | –     | –                  | 50       | (.4)               | 1     | (.6)               | .3           | .06 |
| 1   | 28   | 6        | (.5)               | 0     | (.5)               | 9        | (.5)               | 0     | (.5)               | .02          | .01 |
| 1   | 29   | 2        | (1)                | –     | –                  | 3        | (1)                | –     | –                  | .02          | 0   |
| 1   | 30   | 6        | (.5)               | 0     | (.5)               | 8        | (.5)               | 0     | (.5)               | .02          | 0   |
| 2   | 32   | 24       | (.75)              | -4    | (.25)              | 82       | (.25)              | 3     | (.75)              | .16          | .06 |
| 2   | 33   | -3       | (1)                | –     | –                  | 14       | (.4)               | -22   | (.6)               | .51          | .28 |
| 2   | 35   | -5       | (1)                | –     | –                  | 47       | (.01)              | -15   | (.99)              | .69          | .73 |
| 2   | 37   | 23       | (.9)               | 0     | (.1)               | 64       | (.4)               | -7    | (.6)               | .38          | .21 |
| 2   | 38   | 24       | (1)                | –     | –                  | 34       | (.05)              | 28    | (.95)              | .05          | 0   |
| 2   | 43   | 14       | (1)                | –     | –                  | 12       | (.9)               | 9     | (.1)               | .8           | .83 |
| 2   | 44   | 23       | (1)                | –     | –                  | 24       | (.99)              | -33   | (.01)              | .6           | .31 |
| 2   | 46   | 37       | (.01)              | 9     | (.99)              | 30       | (.6)               | -37   | (.4)               | .65          | .31 |
| 2   | 51   | 42       | (.8)               | -18   | (.2)               | 68       | (.2)               | 23    | (.8)               | .1           | .04 |
| 2   | 52   | 46       | (.2)               | 0     | (.8)               | 46       | (.25)              | -2    | (.75)              | .51          | .41 |
| 2   | 53   | 28       | (1)                | –     | –                  | 42       | (.75)              | -22   | (.25)              | .49          | .26 |
| 2   | 54   | 18       | (1)                | –     | –                  | 64       | (.5)               | -33   | (.5)               | .47          | .31 |
| 2   | 56   | -8       | (1)                | –     | –                  | -5       | (.99)              | -34   | (.01)              | .14          | .02 |

|   |     |          |           |           |           |     |     |
|---|-----|----------|-----------|-----------|-----------|-----|-----|
| 2 | 58  | 85 (.4)  | -7 (.6)   | 40 (.25)  | 24 (.75)  | .23 | .17 |
| 2 | 59  | 17 (.25) | 16 (.75)  | 43 (.4)   | 2 (.6)    | .25 | .12 |
| 2 | 60  | 51 (.1)  | 21 (.9)   | 38 (.6)   | 1 (.4)    | .38 | .32 |
| 3 | 62  | 25 (1)   | – –       | 45 (.2)   | 17 (.8)   | .48 | .28 |
| 3 | 65  | 12 (.4)  | -16 (.6)  | -5 (1)    | – –       | .49 | .2  |
| 3 | 67  | 85 (.25) | 4 (.75)   | 54 (.25)  | 11 (.75)  | .41 | .2  |
| 3 | 68  | 12 (1)   | – –       | 102 (.2)  | -14 (.8)  | .49 | .19 |
| 3 | 70  | 18 (1)   | – –       | 35 (.75)  | -19 (.25) | .46 | .11 |
| 3 | 71  | 13 (.6)  | -20 (.4)  | 76 (.2)   | -26 (.8)  | .44 | .21 |
| 3 | 72  | -9 (1)   | – –       | 13 (.25)  | -8 (.75)  | .11 | 0   |
| 3 | 75  | 13 (1)   | – –       | 50 (.6)   | -45 (.4)  | .46 | .19 |
| 3 | 77  | 1 (1)    | – –       | 38 (.4)   | -9 (.6)   | .21 | .02 |
| 3 | 78  | 19 (1)   | – –       | 44 (.05)  | 9 (.95)   | .8  | .62 |
| 3 | 79  | 32 (.01) | 19 (.99)  | 65 (.01)  | 9 (.99)   | .7  | .79 |
| 3 | 80  | 3 (1)    | – –       | 50 (.4)   | -36 (.6)  | .42 | .16 |
| 3 | 83  | 9 (1)    | – –       | 64 (.01)  | 9 (.99)   | .08 | .01 |
| 3 | 84  | 27 (1)   | – –       | 22 (.99)  | -7 (.01)  | .85 | .92 |
| 3 | 85  | 20 (1)   | – –       | 70 (.25)  | 6 (.75)   | .34 | .14 |
| 3 | 89  | 17 (1)   | – –       | 44 (.1)   | 17 (.9)   | .09 | 0   |
| 3 | 90  | 10 (1)   | – –       | 31 (.75)  | -49 (.25) | .41 | .1  |
| 4 | 91  | 7 (1)    | – –       | 16 (.1)   | 10 (.9)   | .04 | 0   |
| 4 | 92  | 8 (.8)   | -37 (.2)  | 102 (.2)  | -29 (.8)  | .36 | .18 |
| 4 | 94  | 7 (1)    | – –       | 6 (.75)   | 1 (.25)   | .78 | .89 |
| 4 | 96  | 35 (.5)  | -47 (.5)  | -10 (.75) | -15 (.25) | .45 | .24 |
| 4 | 97  | 10 (1)   | – –       | 45 (.2)   | -5 (.8)   | .59 | .32 |
| 4 | 100 | 18 (.6)  | -29 (.4)  | -1 (1)    | – –       | .22 | .1  |
| 4 | 104 | -6 (1)   | – –       | 3 (.99)   | -27 (.01) | .05 | .01 |
| 4 | 105 | 30 (1)   | – –       | 90 (.01)  | 36 (.99)  | .06 | 0   |
| 4 | 108 | 16 (1)   | – –       | 91 (.2)   | -11 (.8)  | .52 | .34 |
| 4 | 109 | 11 (1)   | – –       | 26 (.5)   | -9 (.5)   | .41 | .2  |
| 4 | 111 | 28 (1)   | – –       | 47 (.6)   | -13 (.4)  | .52 | .16 |
| 4 | 114 | 72 (.01) | -2 (.99)  | 112 (.25) | -33 (.75) | .31 | .14 |
| 4 | 117 | -6 (1)   | – –       | 7 (.5)    | -30 (.5)  | .48 | .21 |
| 4 | 120 | -9 (.95) | -26 (.05) | -1 (.1)   | -11 (.9)  | .29 | .2  |
| 5 | 122 | 68 (.05) | -14 (.95) | -11 (.9)  | -36 (.1)  | .46 | .28 |
| 5 | 123 | 28 (.75) | -13 (.25) | 57 (.1)   | 16 (.9)   | .08 | .02 |
| 5 | 124 | 15 (.95) | 7 (.05)   | 42 (.01)  | 19 (.99)  | .06 | 0   |
| 5 | 125 | 28 (1)   | – –       | 41 (.4)   | 12 (.6)   | .44 | .22 |
| 5 | 128 | -3 (1)   | – –       | 32 (.4)   | -16 (.6)  | .15 | .04 |
| 5 | 130 | 72 (.4)  | -41 (.6)  | 16 (.01)  | 1 (.99)   | .21 | .1  |

|   |     |    |      |     |      |    |       |     |       |     |     |
|---|-----|----|------|-----|------|----|-------|-----|-------|-----|-----|
| 5 | 131 | 18 | (1)  | –   | –    | 45 | (.01) | 11  | (.99) | .65 | .65 |
| 5 | 135 | 6  | (1)  | –   | –    | 8  | (.5)  | -1  | (.5)  | .55 | .35 |
| 5 | 136 | 4  | (1)  | –   | –    | 25 | (.01) | -5  | (.99) | .72 | .75 |
| 5 | 138 | 23 | (1)  | –   | –    | 21 | (.8)  | 16  | (.2)  | .78 | .8  |
| 5 | 140 | -2 | (1)  | –   | –    | 9  | (.25) | 8   | (.75) | .01 | 0   |
| 5 | 141 | 28 | (.8) | -26 | (.2) | 22 | (.75) | 2   | (.25) | .09 | .01 |
| 5 | 142 | 23 | (1)  | –   | –    | 29 | (.8)  | -8  | (.2)  | .48 | .15 |
| 5 | 143 | 67 | (.5) | -39 | (.5) | 93 | (.25) | -15 | (.75) | .25 | .02 |
| 6 | 157 | 16 | (1)  | –   | –    | 33 | (.5)  | 14  | (.5)  | .03 | 0   |
| 6 | 159 | 14 | (1)  | –   | –    | 20 | (.95) | 16  | (.05) | .03 | 0   |
| 6 | 160 | 60 | (.1) | 19  | (.9) | 34 | (.8)  | 23  | (.2)  | .06 | .01 |
| 6 | 162 | 39 | (.6) | 14  | (.4) | 48 | (.25) | 24  | (.75) | .19 | .07 |
| 6 | 163 | 25 | (1)  | –   | –    | 35 | (.2)  | 12  | (.8)  | .75 | .49 |
| 6 | 164 | 1  | (.5) | 1   | (.5) | 40 | (.01) | -4  | (.99) | .77 | .61 |
| 6 | 166 | -6 | (1)  | –   | –    | 15 | (.6)  | -10 | (.4)  | 0   | 0   |
| 6 | 167 | 13 | (1)  | –   | –    | 12 | (.8)  | 8   | (.2)  | .86 | .9  |
| 6 | 172 | 21 | (1)  | –   | –    | 26 | (.8)  | -24 | (.2)  | .63 | .28 |
| 7 | 182 | 28 | (1)  | –   | –    | 27 | (.95) | -11 | (.05) | .9  | .94 |
| 7 | 185 | 7  | (1)  | –   | –    | 18 | (.99) | -19 | (.01) | .08 | 0   |
| 7 | 186 | 19 | (1)  | –   | –    | 97 | (.1)  | 5   | (.9)  | .5  | .23 |
| 7 | 187 | -3 | (1)  | –   | –    | 43 | (.2)  | -20 | (.8)  | .44 | .21 |
| 7 | 189 | 2  | (1)  | –   | –    | 4  | (.75) | -23 | (.25) | .65 | .34 |
| 7 | 190 | 10 | (1)  | –   | –    | 28 | (.2)  | -1  | (.8)  | .62 | .28 |
| 7 | 191 | 16 | (1)  | –   | –    | 15 | (.8)  | -12 | (.2)  | .89 | .91 |
| 7 | 192 | 10 | (1)  | –   | –    | 59 | (.01) | 4   | (.99) | .68 | .49 |
| 7 | 200 | 16 | (1)  | –   | –    | 40 | (.6)  | -15 | (.4)  | .39 | .09 |
| 7 | 202 | 53 | (.1) | 27  | (.9) | 32 | (.95) | 9   | (.05) | .25 | .15 |
| 7 | 207 | 22 | (.9) | -41 | (.1) | 14 | (.99) | 6   | (.01) | .19 | .12 |

*Note.* Each of the description-based games used in study 1 are shown here, along with the set of games that they belong to.  $A_H$  = high outcome for option A.  $A_L$  = low outcome for option A (same notation for option B).  $Pr_H$  = high outcome for given option.  $Pr_L$  = low outcome for given option.  $Pr(\text{Choose A})$  indicates the portion of trials that subjects choose option A both in the 5 trials before feedback (No FB) and in the remaining 20 trials following feedback (FB).

Figure S1.

Posterior predictive simulations for set 1, games 1-6

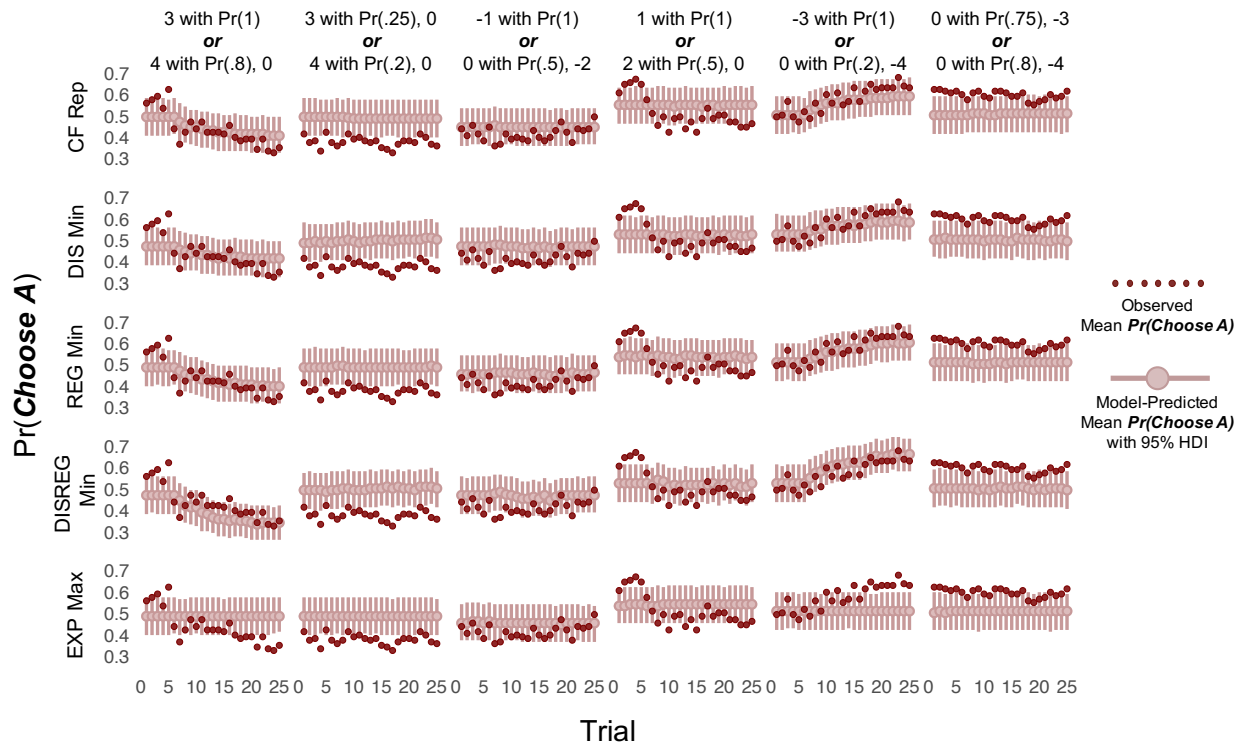

Figure S2.

Posterior predictive simulations for set 1, games 7-12

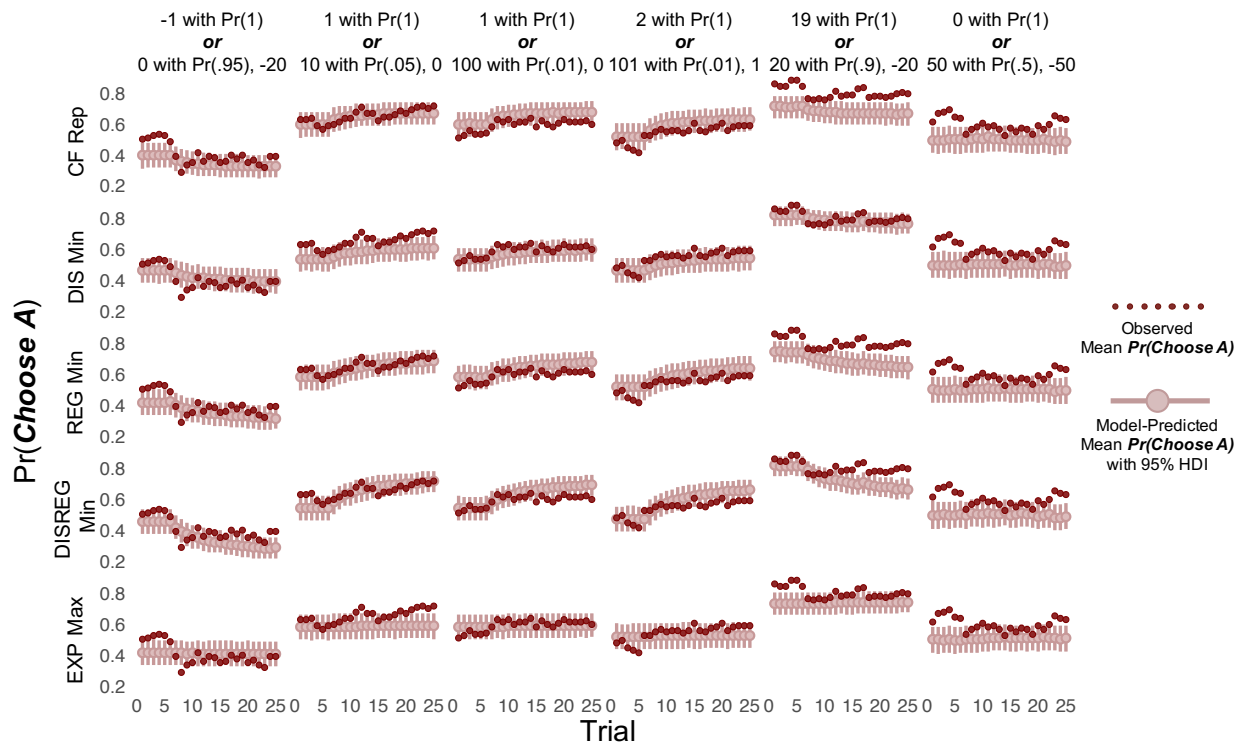

Figure S3.

*Posterior predictive simulations for set 1, games 13-18*

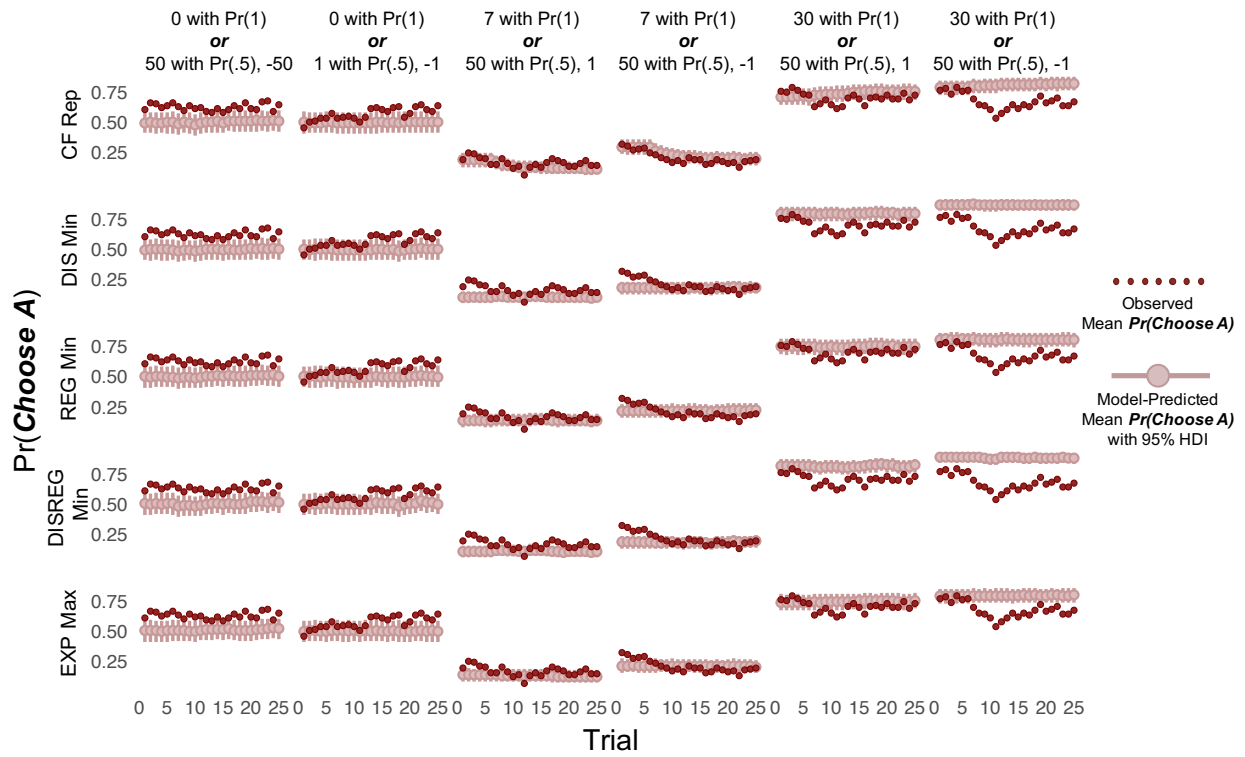

Figure S4.

*Posterior predictive simulations for set 1, games 24-26 and 28-30*

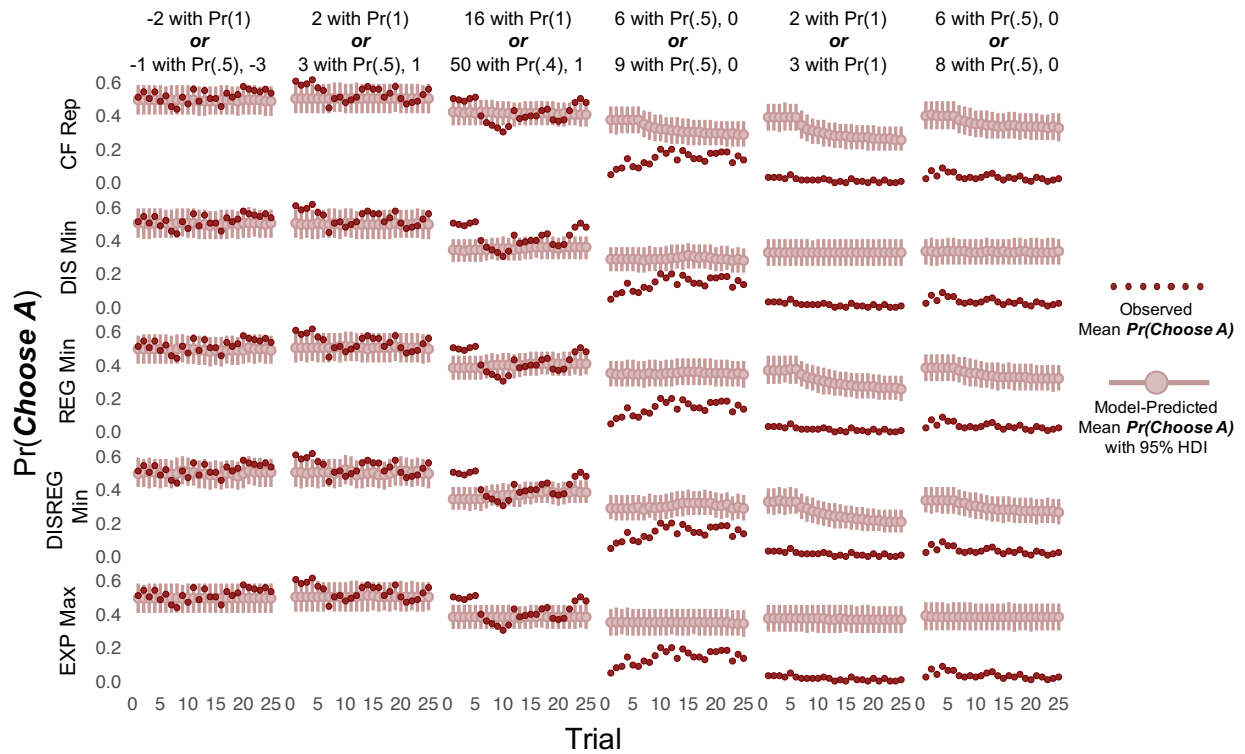

Figure S5.

Posterior predictive simulations for set 2, games 32, 33, 35, 37, 38, and 43

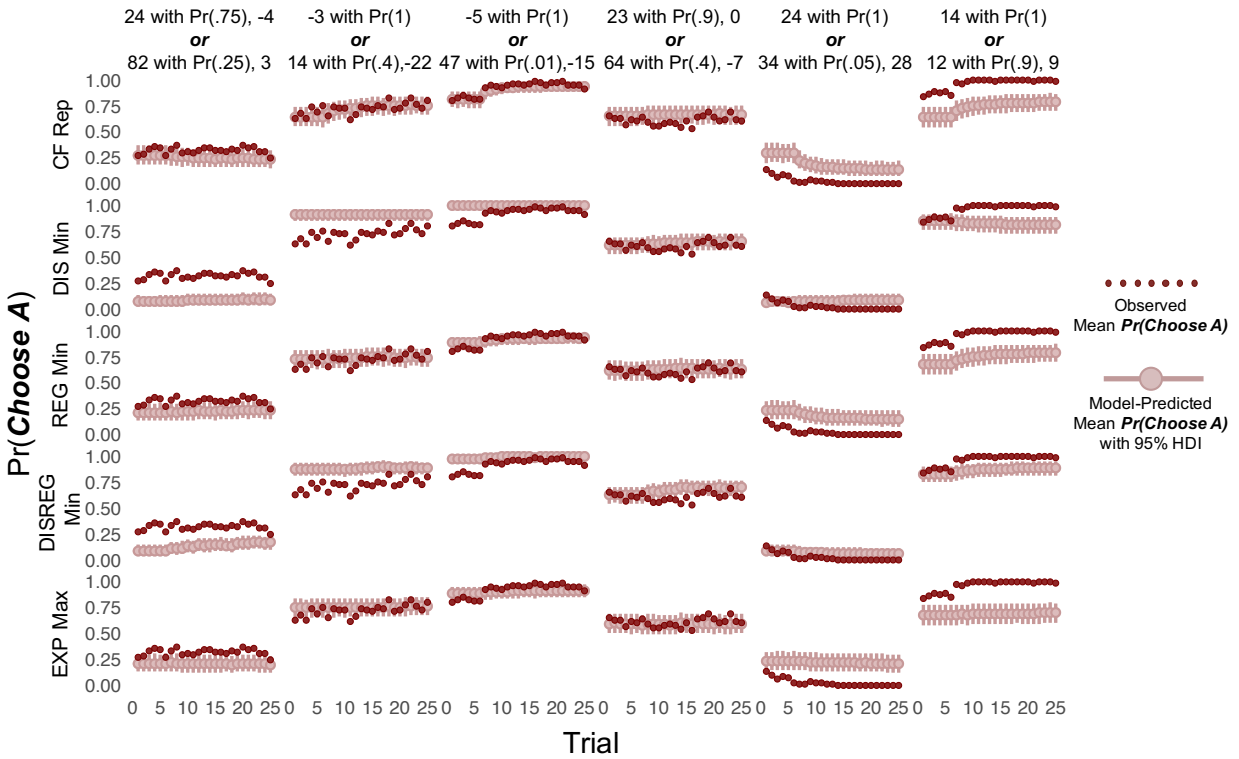

Figure S6.

Posterior predictive simulations for set 2, games 44, 46, 51, and 52-54

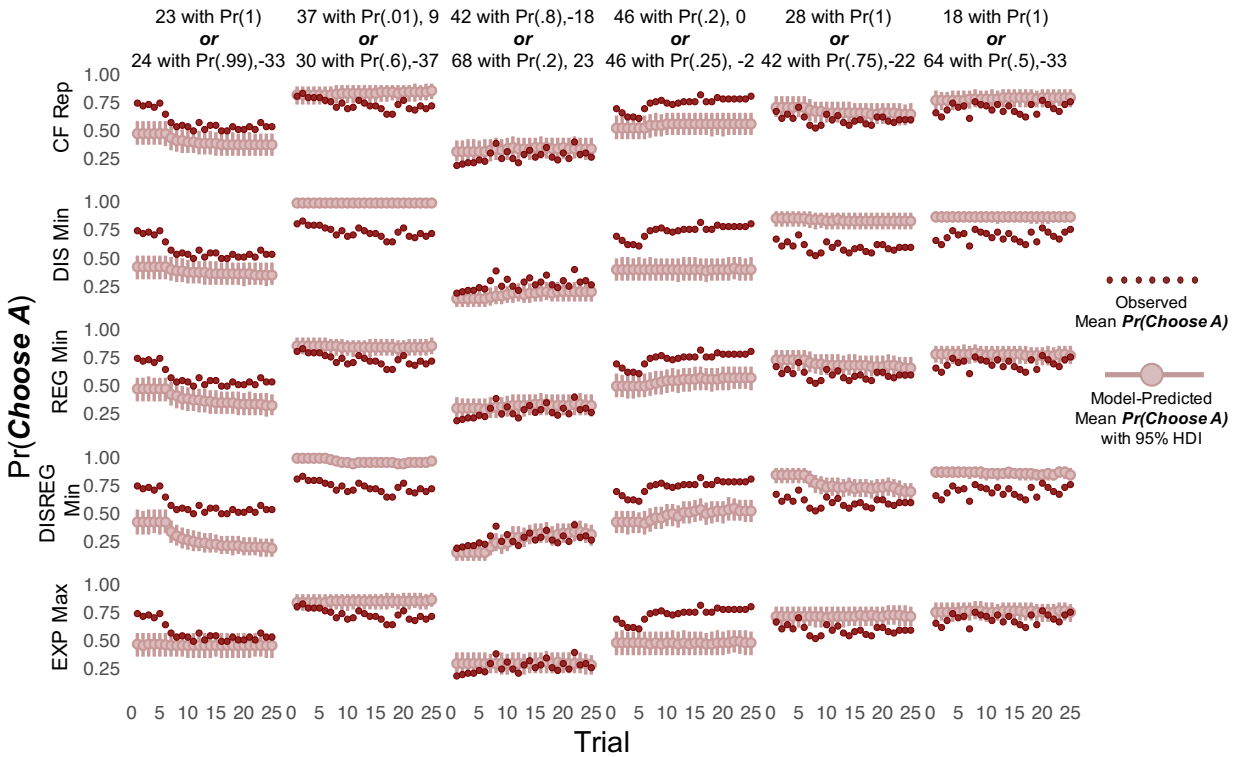

Figure S7.

Posterior predictive simulations for set 2, games 56, and 58-60

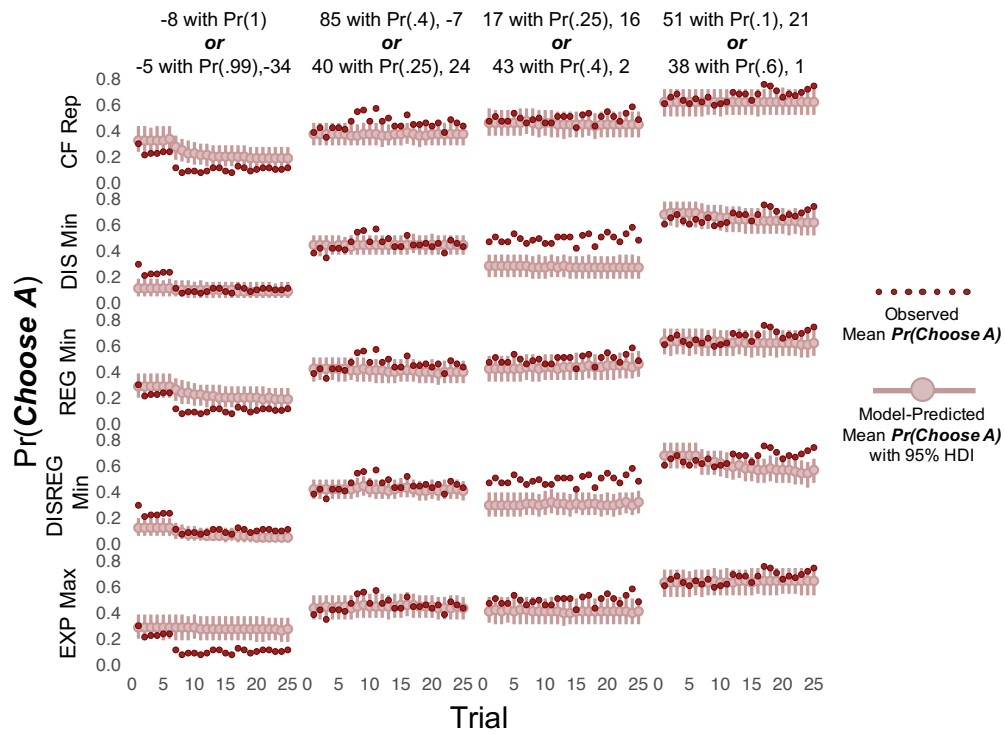

Figure S8.

Posterior predictive simulations for set 3, games 62, 65, 67, 68, 70, and 71

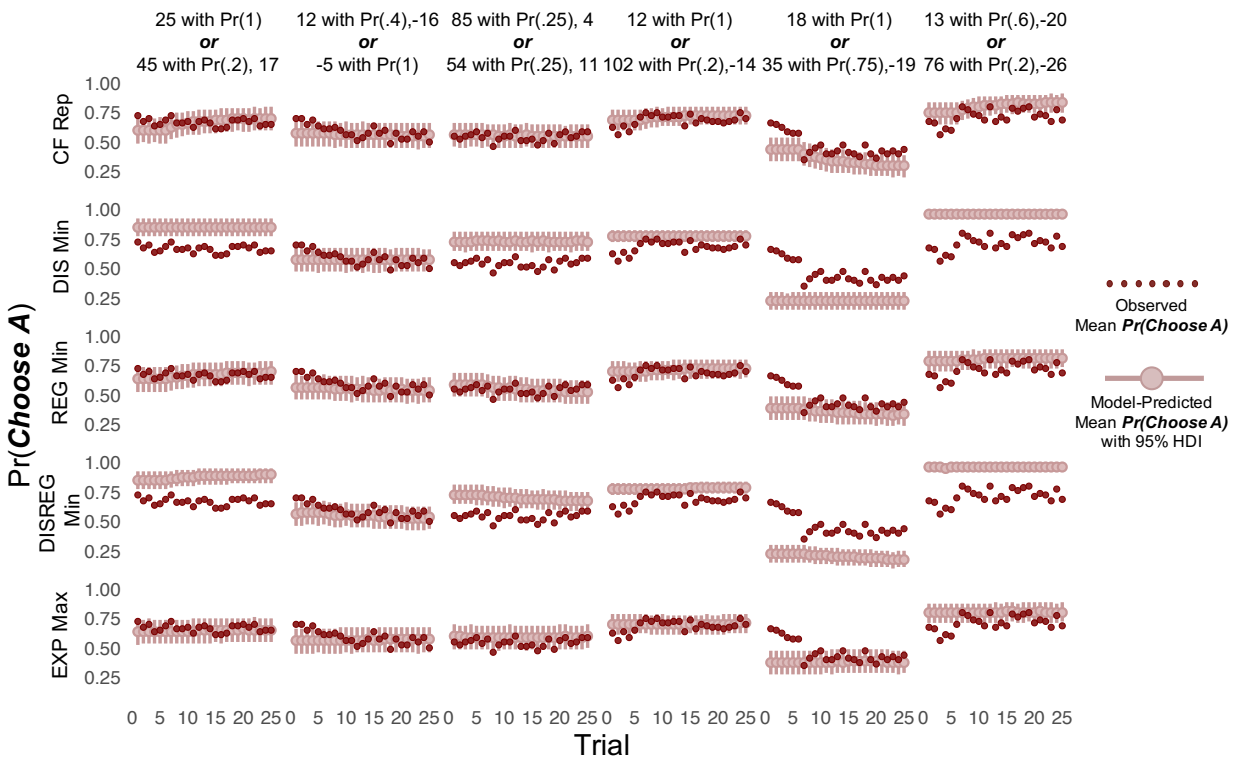

Figure S9.

Posterior predictive simulations for set 3, games 72, 75, 77, and 78-80

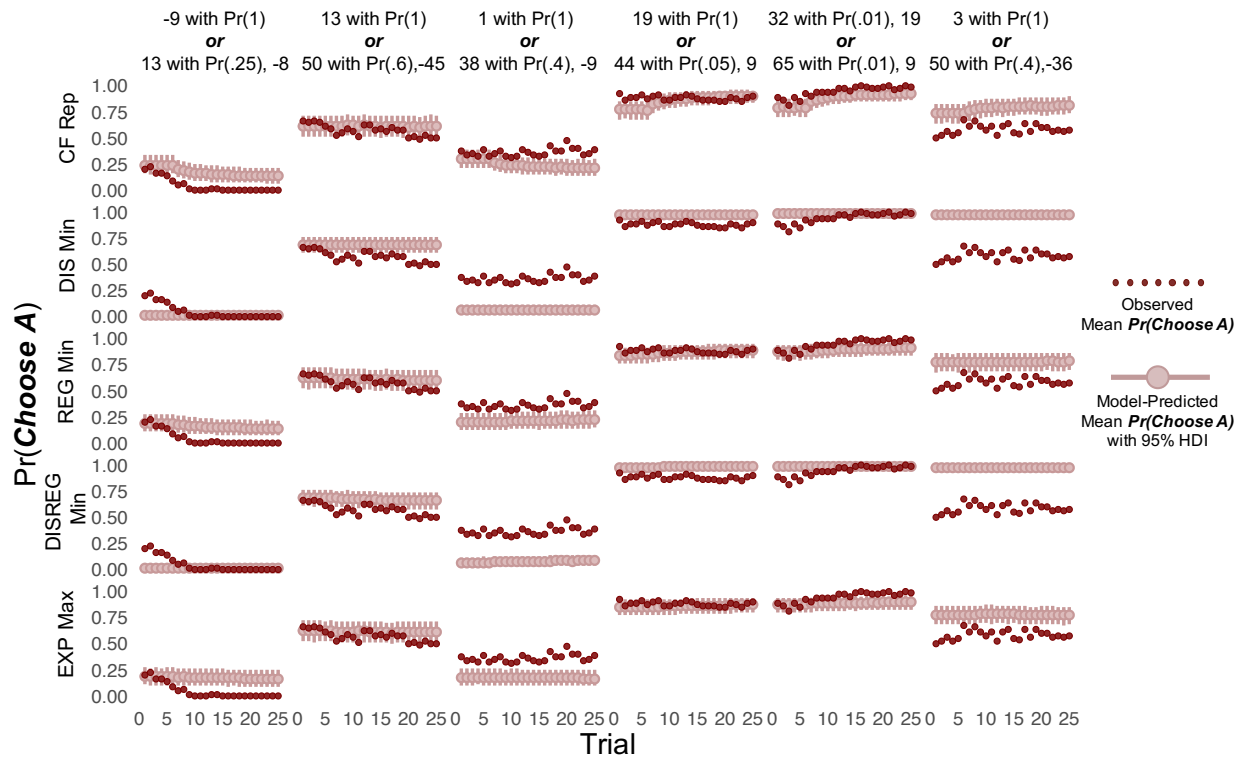

Figure S10.

Posterior predictive simulations for set 3, games 83-85, 89, and 90

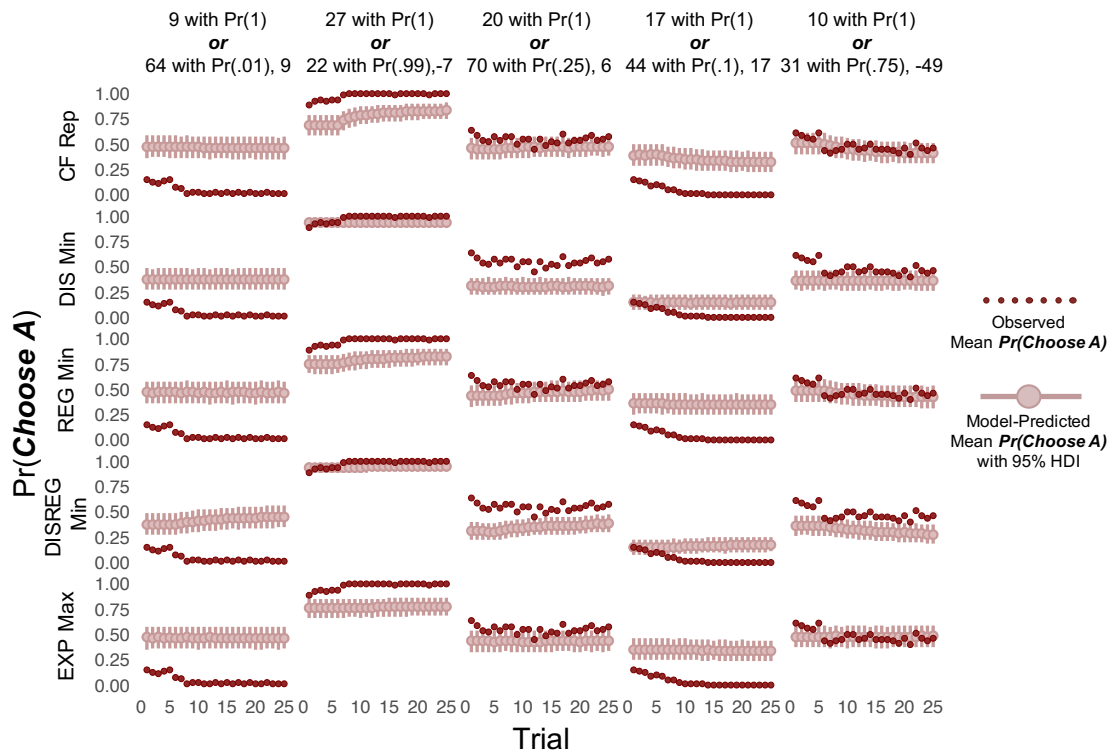



Figure S11.

Posterior predictive simulations for set 4, games 91, 92, 94, 96, 97, and 100

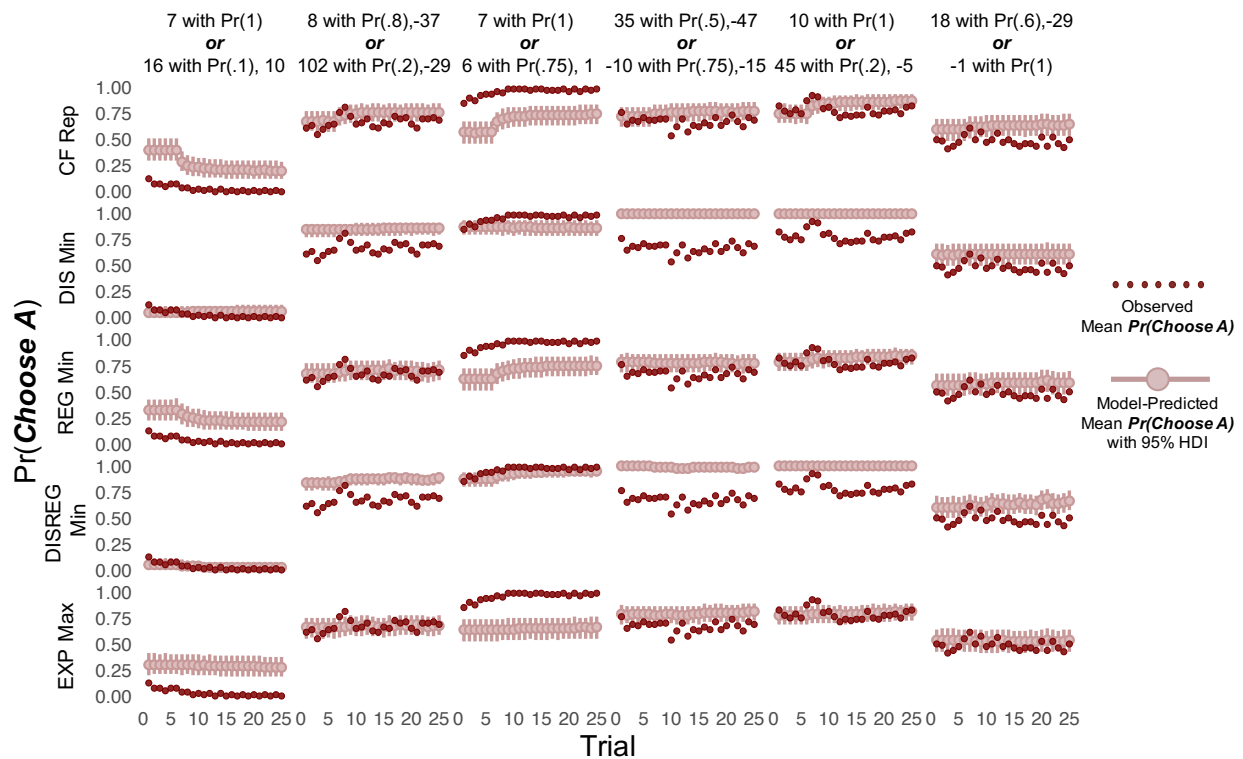

Figure S12.

Posterior predictive simulations for set 4, games 104, 105, 108, 109, 111, and 114

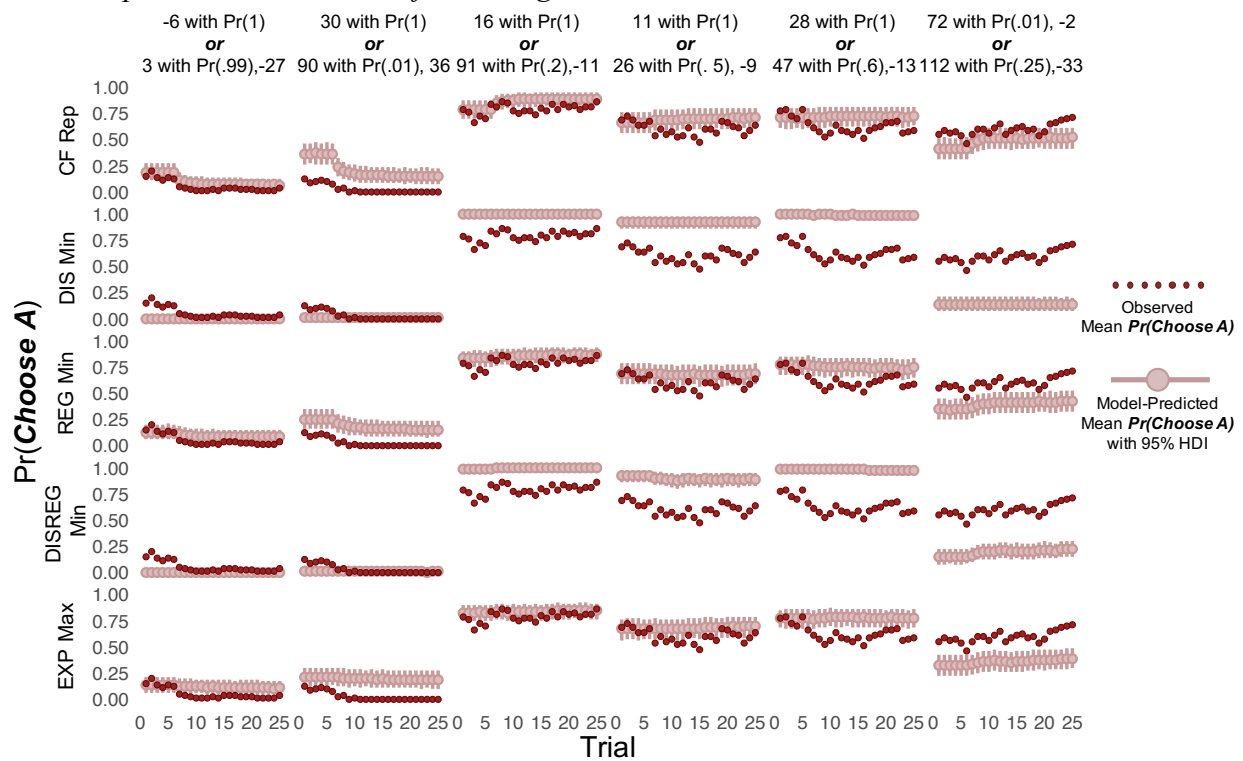

Figure S13.

Posterior predictive simulations for set 4, games 117 and 120

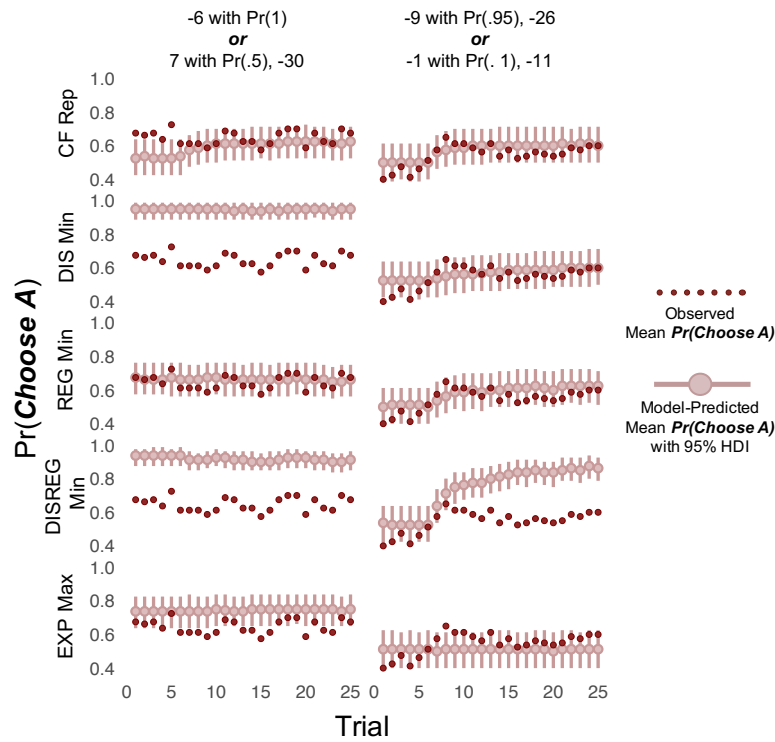

Figure S14.

Posterior predictive simulations for set 4, games 122-125, 128, and 130

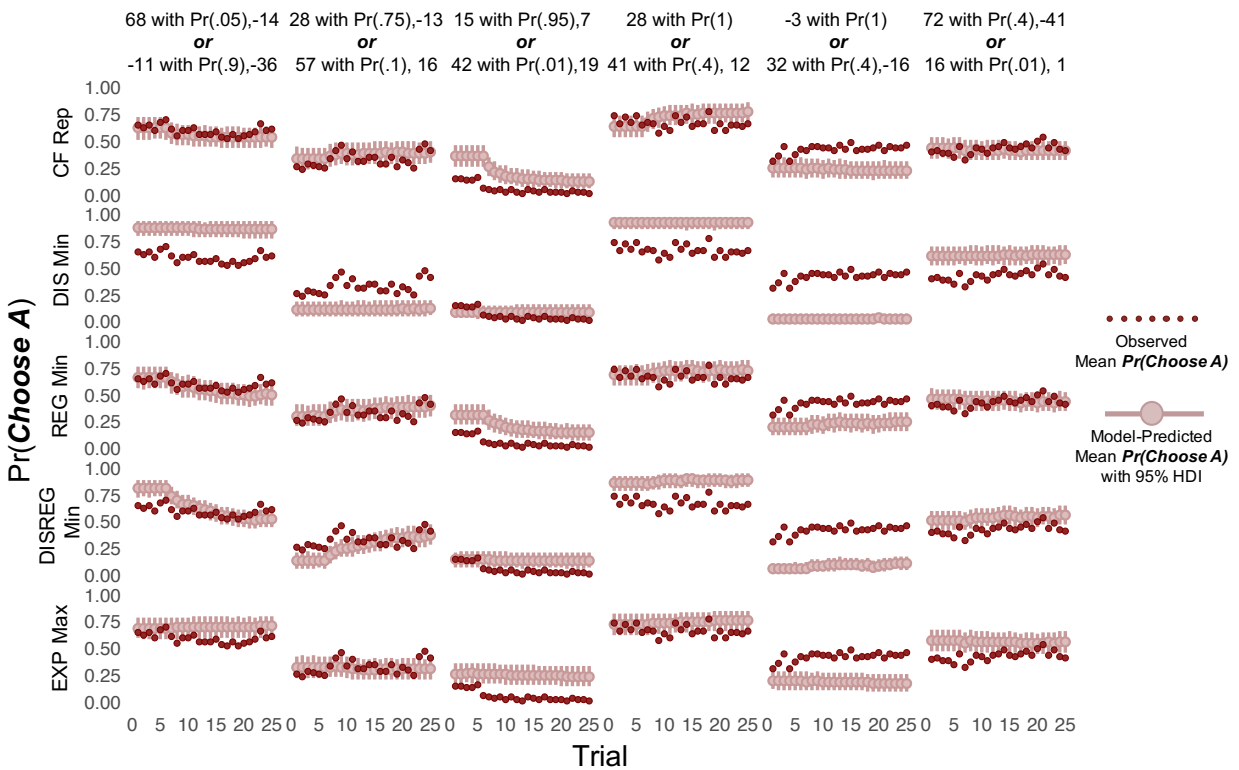

Figure S15.

Posterior predictive simulations for set 5, games 131, 135, 136, 138, 140, and 141

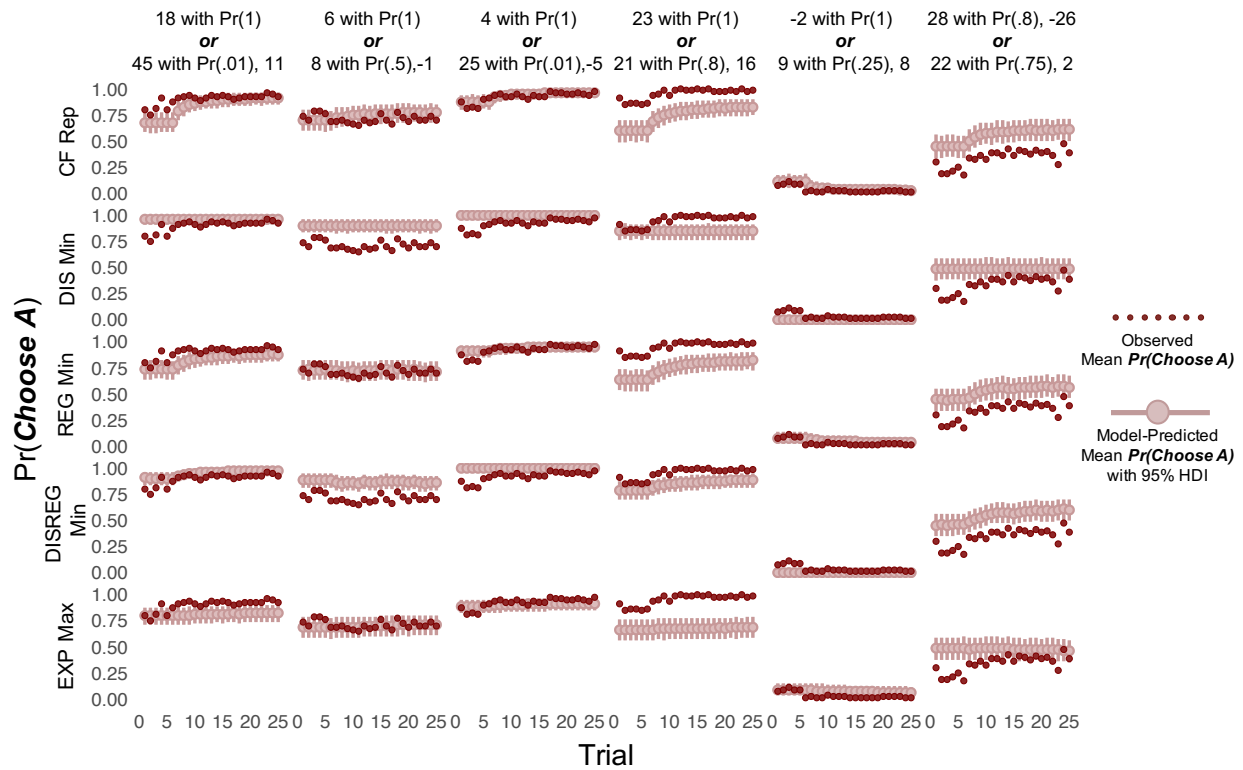

Figure S16.

Posterior predictive simulations for set 5, games 142 and 143

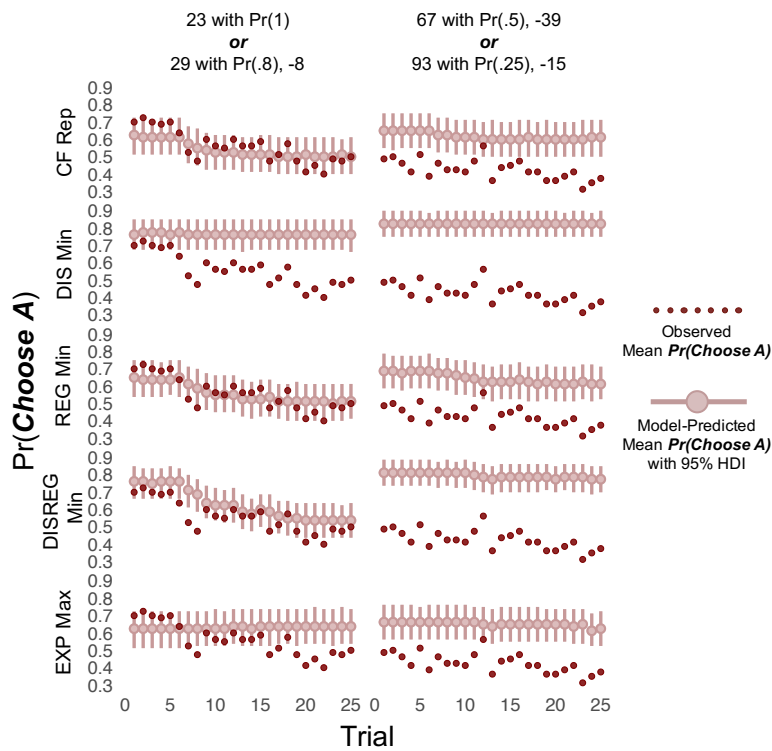

Figure S17.

Posterior predictive simulations for set 6, games 157, 159, 160, 162, 163, and 164

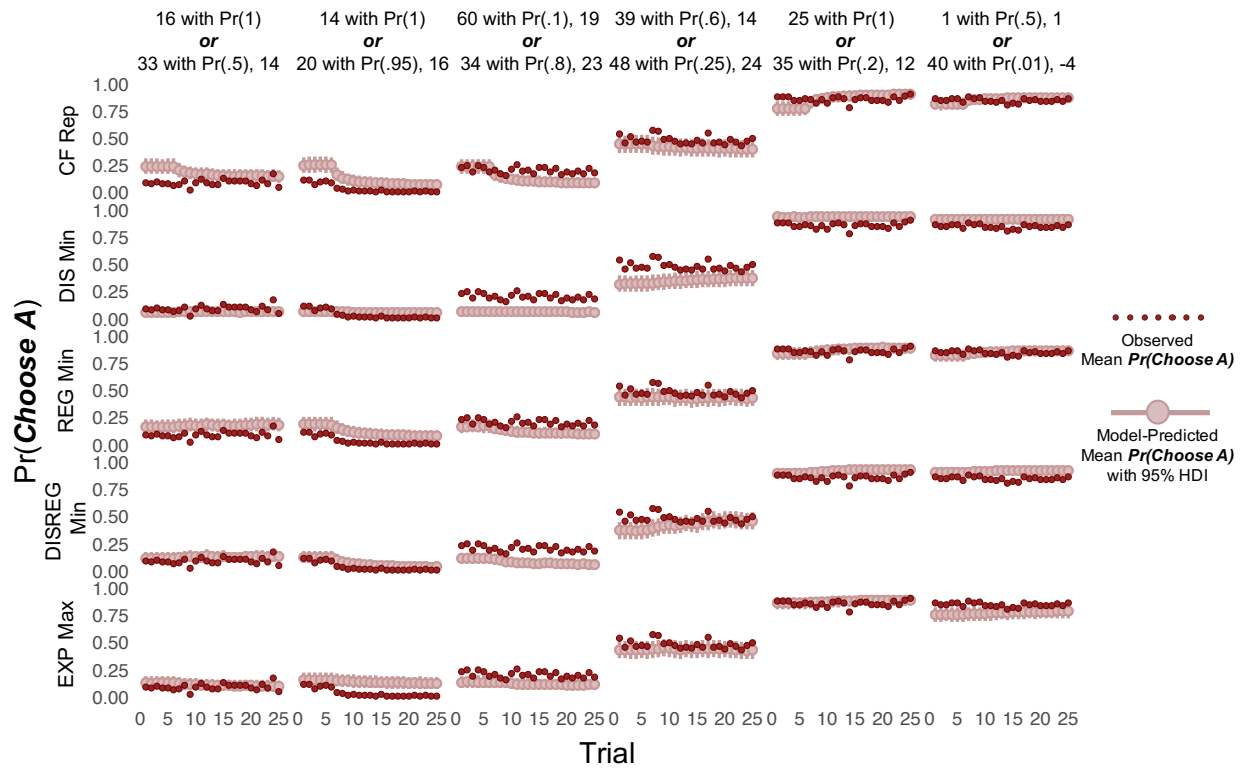

Figure S18.

Posterior predictive simulations for set 6, games 166, 167, and 172

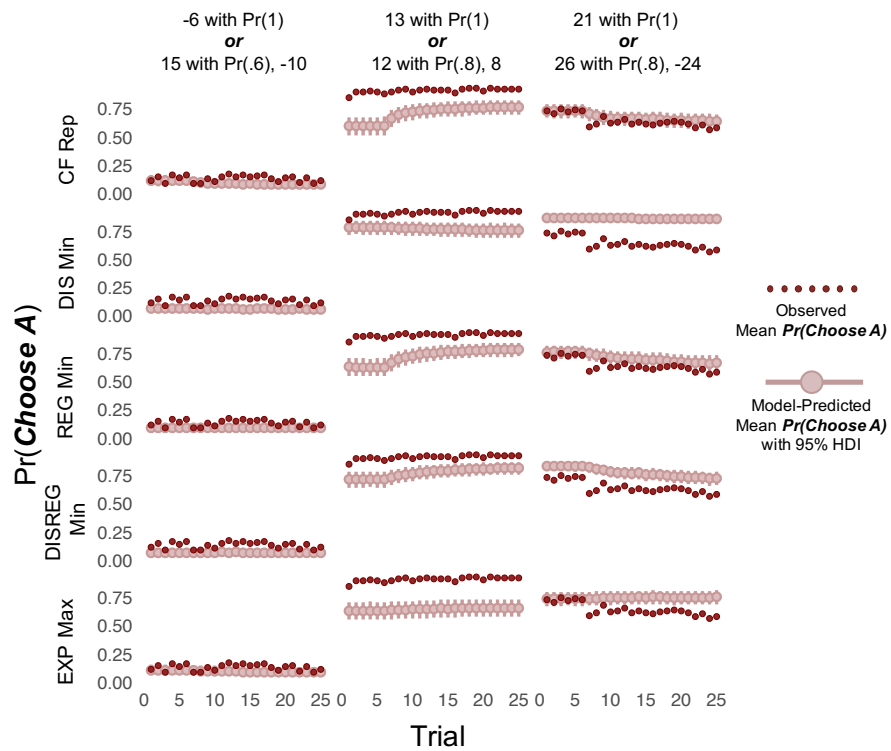

Figure S19.

Posterior predictive simulations for set 7, games 182, 185-187, 189, and 190

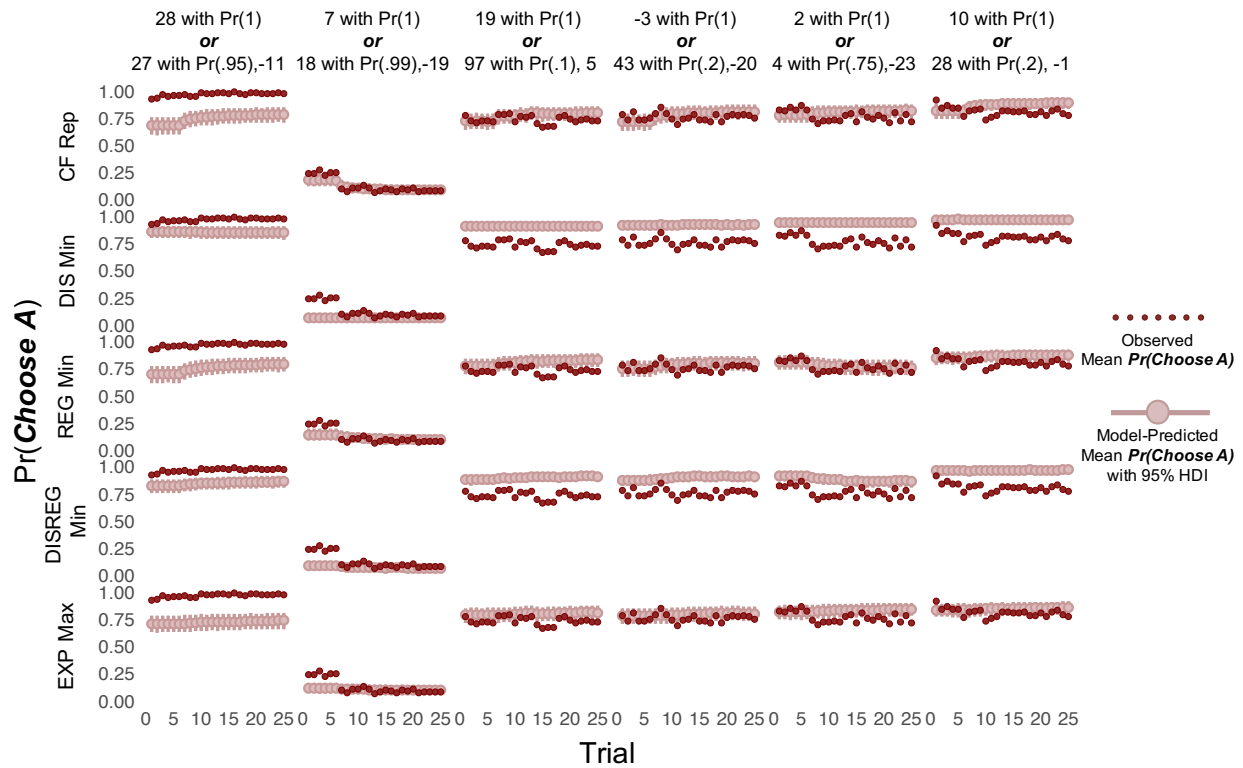

Figure S20.

Posterior predictive simulations for set 7, games 191, 192, 200, 202, and 207

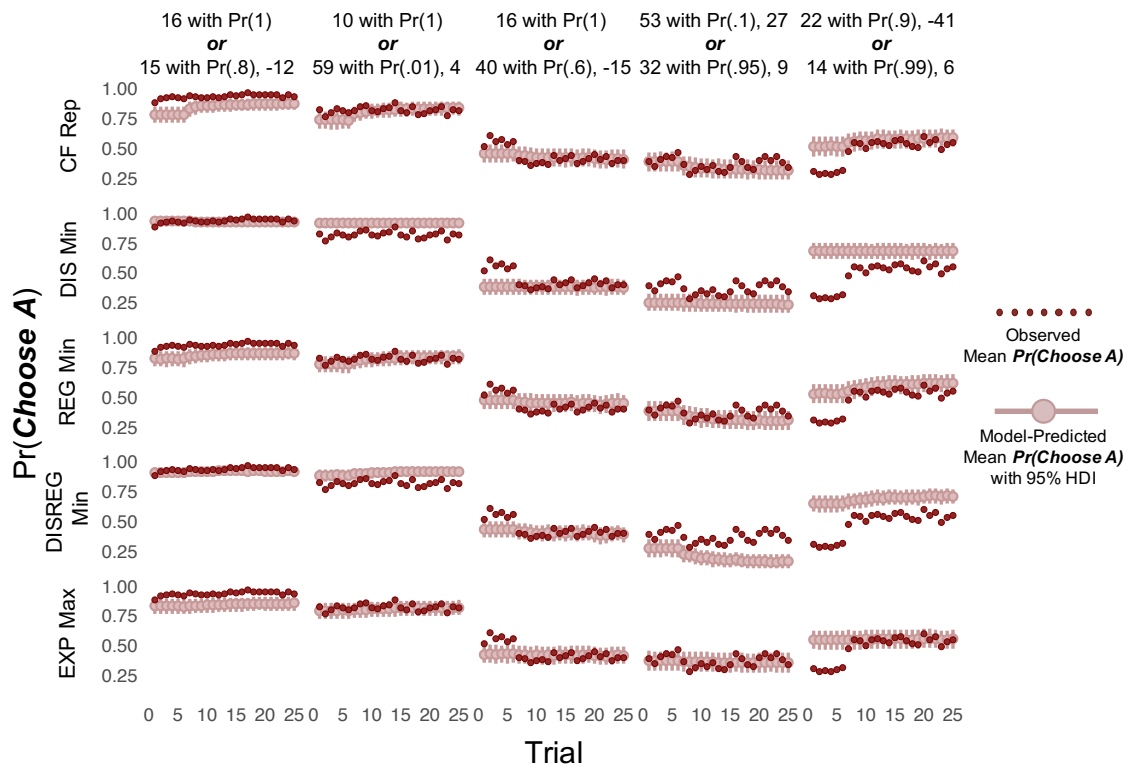

Supplement: Supplementary file [file media-1.pdf]
